# Supplementary material
Source: MDPI journal article supplement (https://www.mdpi.com/2073-4395/12/2/327)
Supplement: s1 [file s1]

Supplemental Table S4. Summary of the repeated measures three-way ANOVA analyses of forage yield

| Effect                 | Degree of freedom | F statistics | P-value  | P <0.05 |
|------------------------|-------------------|--------------|----------|---------|
| treatment              | 3                 | 85.124       | 2.62E-05 | *       |
| cultivars              | 1                 | 23.464       | 4.00E-02 | *       |
| cut                    | 2                 | 41.35        | 2.00E-03 | *       |
| treatment:cultivars    | 3                 | 6.894        | 2.30E-02 | *       |
| treatment:cut          | 6                 | 19.871       | 1.39E-05 | *       |
| cultivar:cut           | 2                 | 15.267       | 1.30E-02 | *       |
| treatment:cultivar:cut | 6                 | 2.587        | 7.60E-02 |         |
