# Supplementary material
Source: MDPI journal article supplement (https://www.mdpi.com/2073-4395/12/2/327)
Supplement: s1 [file s1]

Supplemental Table S3. Summary of the repeated measures three-way ANOVA analyses of shoot mass

| Effect                  | Degree of freedom | F statistics | p-value  | P<0.05 |
|-------------------------|-------------------|--------------|----------|--------|
| treatment               | 3                 | 58.547       | 7.79E-05 | *      |
| cultivars               | 1                 | 5.985        | 0.134    |        |
| cut                     | 2                 | 22.322       | 0.007    | *      |
| treatment:cultivars     | 3                 | 10.216       | 0.009    | *      |
| treatment:cut           | 6                 | 9.125        | 0.000677 | *      |
| cultivars:cut           | 2                 | 8.275        | 0.038    | *      |
| treatment:cultivars:cut | 6                 | 6.156        | 0.004    | *      |
