# Supplementary material
Source: MDPI journal article supplement (https://www.mdpi.com/2073-4395/12/2/327)
Supplement: s1 [file s1]

Supplemental Table S2. Summary of the repeated measures three-way ANOVA analyses of shoots per plant

| Effect                  | Degree of freedom | F statistics | p-value  | p<0.05 |
|-------------------------|-------------------|--------------|----------|--------|
| treatment               | 3                 | 30.818       | 0.000484 | *      |
| cultivars               | 1                 | 1.333        | 0.368    |        |
| cut                     | 2                 | 3.535        | 0.131    |        |
| treatment:cultivars     | 3                 | 1.93         | 0.226    |        |
| treatment:cut           | 6                 | 6.215        | 0.004    | *      |
| cultivars:cut           | 2                 | 1.087        | 0.42     |        |
| treatment:cultivars:cut | 6                 | 1.17         | 0.383    |        |
