# Supplementary material
Source: MDPI journal article supplement (https://www.mdpi.com/2073-4395/12/2/327)
Supplement: s1 [file s1]

Supplemental Table S1. Summary of the repeated measures three-way ANOVA analyses of plant height. Treatment for the 4 phosphor treatments; cultivars for the two cultivars; cut for the three harvests. Definition of the terms are the same for the rest supplemental tables hereafter.

| Effect                  | Degree of freedom | F statistics | p-value  | P<0.05 |
|-------------------------|-------------------|--------------|----------|--------|
| treatment               | 3                 | 13.118       | 0.005    | *      |
| cultivars               | 1                 | 1.574        | 0.336    |        |
| cut                     | 2                 | 86.367       | 0.000512 | *      |
| treatment:cultivars     | 3                 | 1.634        | 0.278    |        |
| treatment:cut           | 6                 | 10.928       | 0.000289 | *      |
| cultivars:cut           | 2                 | 89.052       | 0.000482 | *      |
| treatment:cultivars:cut | 6                 | 1.533        | 0.249    |        |
